# Supplementary material for: Three-dimensional porous graphene-like carbon cloth from cotton as a free-standing lithium-ion battery anode
Source: Royal Society of Chemistry journal article supplement (doi:10.1039/c6ta04307k), 2016-01-01
Supplement: c6ta04307k1.pdf [file c6ta04307k1.pdf]

## Electronic Supporting Information

### Three Dimensional Porous Graphene-Like Carbon Cloth from Cotton for a Free-Standing Lithium-Ion Battery Anode

Hui Bi,<sup>a</sup> Zhanqiang Liu,<sup>a</sup> Feng Xu,<sup>a</sup> Yufeng Tang,<sup>a</sup> Tianquan Lin,<sup>a</sup> and Fuqiang Huang<sup>\*,a,b</sup>

<sup>a</sup>State Key Laboratory of High Performance Ceramics and Superfine Microstructures and CAS Key Laboratory of Materials for Energy Conversion, Shanghai Institute of Ceramics, Chinese Academy of Sciences, Shanghai 200050, P.R. China. \*Email - huangfq@mail.sic.ac.cn

<sup>b</sup>State Key Laboratory of Rare Earth Materials Chemistry and Applications and Beijing National Laboratory for Molecular Sciences, College of Chemistry and Molecular Engineering, Peking University, Beijing 100871, P.R. China.

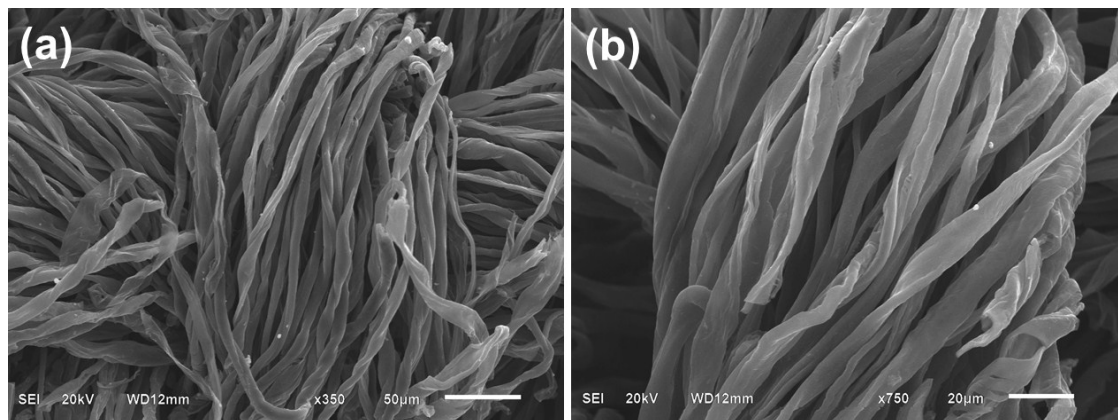

**Figure S1.** (a, b) FESEM images of the pristine porous carbon cloth.

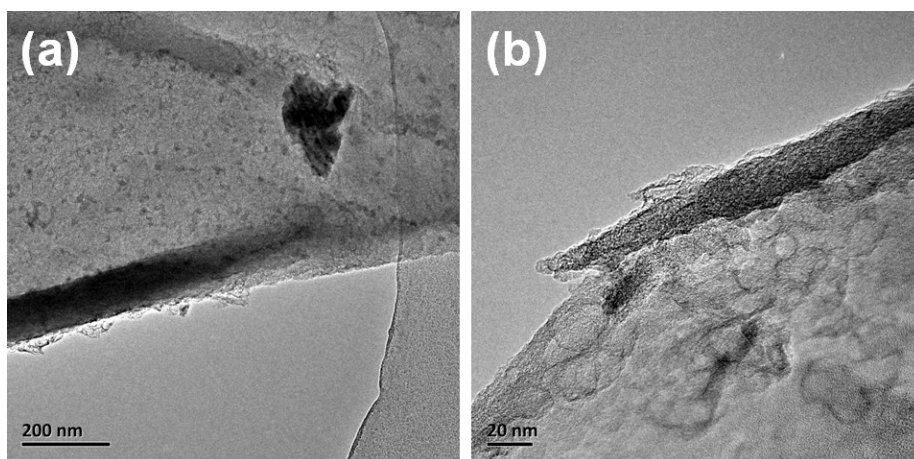

**Figure S2.** (a, b) TEM images of the pristine porous carbon cloth.

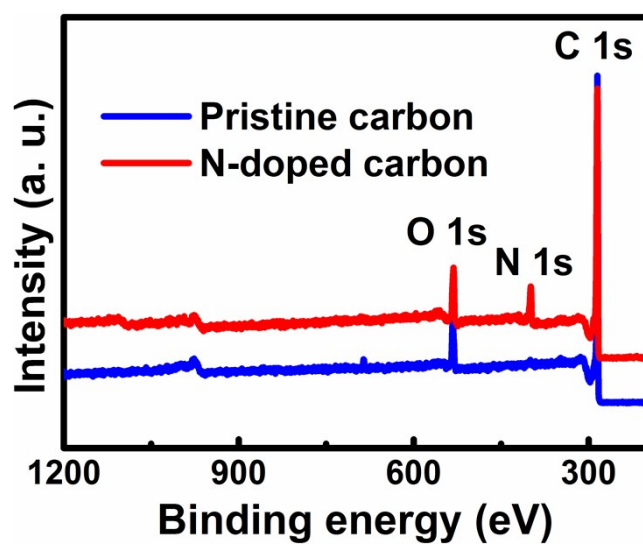

**Figure S3.** XPS spectra of the pristine and N-doped porous carbon cloth.

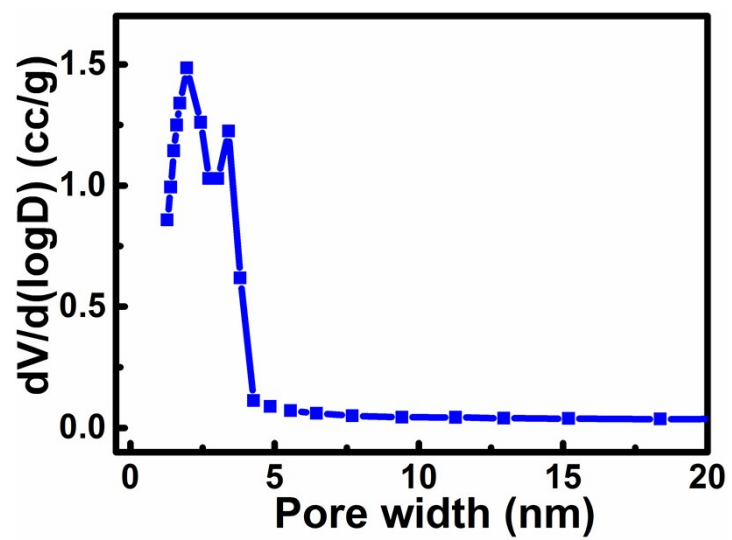

**Figure S4.** Pore size distributions of N-doped porous carbon cloth.

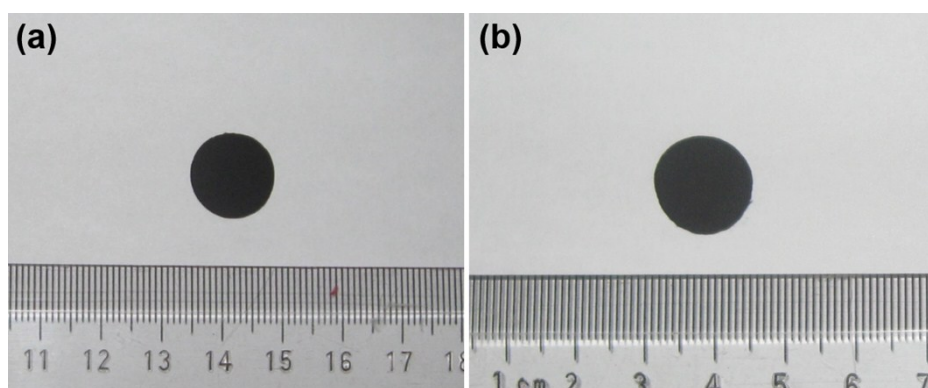

**Figure S5.** (a, b) Optical images of free-standing N-doped carbon cloth (a) before and (b) after 200 charge/discharge cycles.

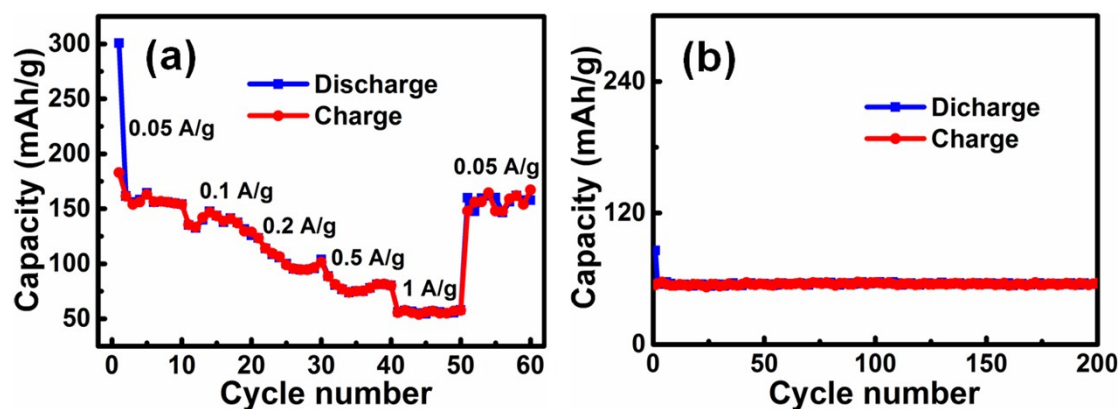

**Figure S6.** (a) Rate capabilities of commercial carbon cloth obtained over a wide range of high current densities, from  $50 \text{ mA g}^{-1}$  to  $1.0 \text{ A g}^{-1}$ . (b) Cycle performance of commercial carbon cloth obtained at a current density of  $1.0 \text{ A g}^{-1}$ .

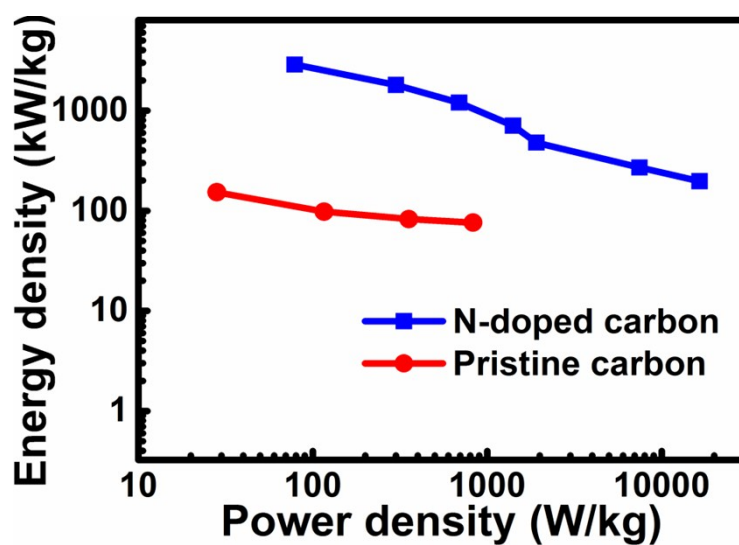

**Figure S7.** Ragone plots for pristine and N-doped porous carbon cloth based LIB cells.

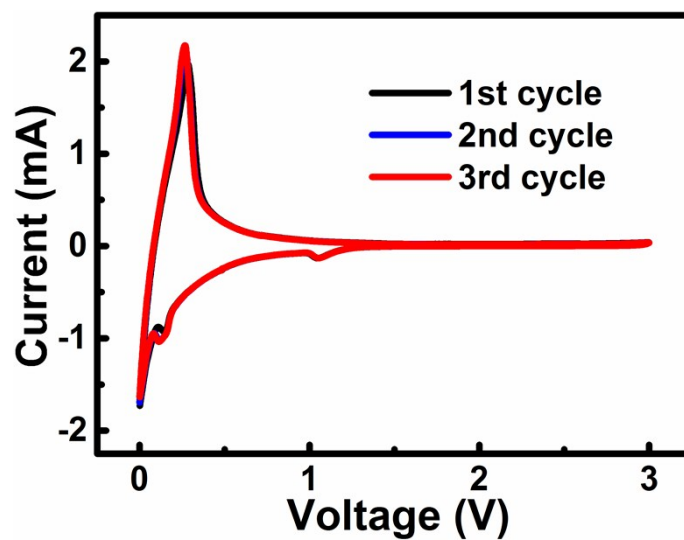

**Figure S8.** Cyclic voltammetry curves of the pristine porous carbon cloth.

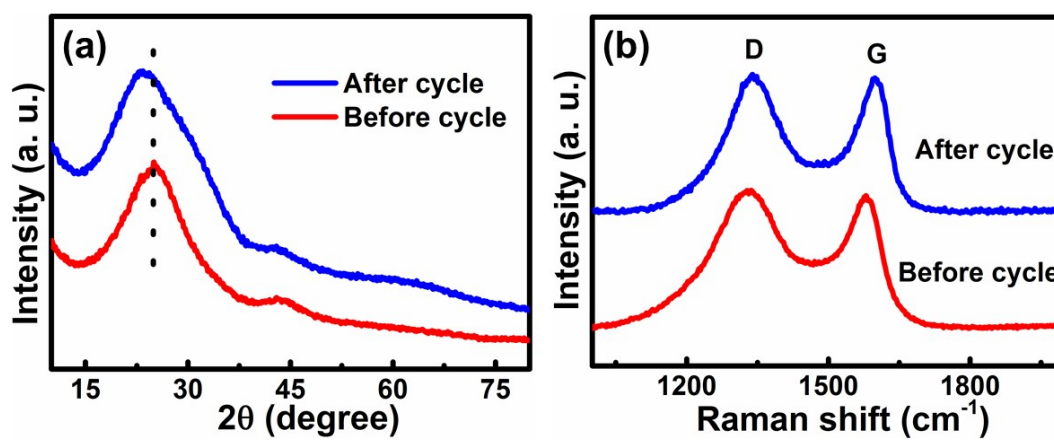

**Figure S9.** (a) XRD and (b) Raman spectra of the N-doped porous carbon cloth before and after 200 charge–discharge cycles.

**Table S1.** Electrolyte resistances and charge transfer resistances of the N-doped porous carbon cloth electrode estimated from EIS data.

| <b>N-doped carbon cloth</b> | <b>Electrolyte resistance<br/>(ohm)</b> | <b>Charge transfer resistance<br/>(ohm)</b> |
|-----------------------------|-----------------------------------------|---------------------------------------------|
| 1st                         | 3.1                                     | 149.7                                       |
| 200th                       | 3.8                                     | 80.4                                        |
